# Supplementary material for: Mechanism of Crosstalk between the LSD1 Demethylase and HDAC1 Deacetylase in the CoREST Complex
Source: PubMed Central journal article supplement (PMC7043024; doi:10.1016/j.celrep.2020.01.091), 2020-02-25
Supplement: mmc1.pdf [file mmc1.pdf]

**Cell Reports, Volume 30**

**Supplemental Information**

**Mechanism of Crosstalk between  
the LSD1 Demethylase and HDAC1  
Deacetylase in the CoREST Complex**

**Yun Song, Lisbeth Dagil, Louise Fairall, Naomi Robertson, Mingxuan Wu, T.J. Ragan, Christos G. Savva, Almutasem Saleh, Nobuhiro Morone, Micha B.A. Kunze, Andrew G. Jamieson, Philip A. Cole, D. Flemming Hansen, and John W.R. Schwabe**



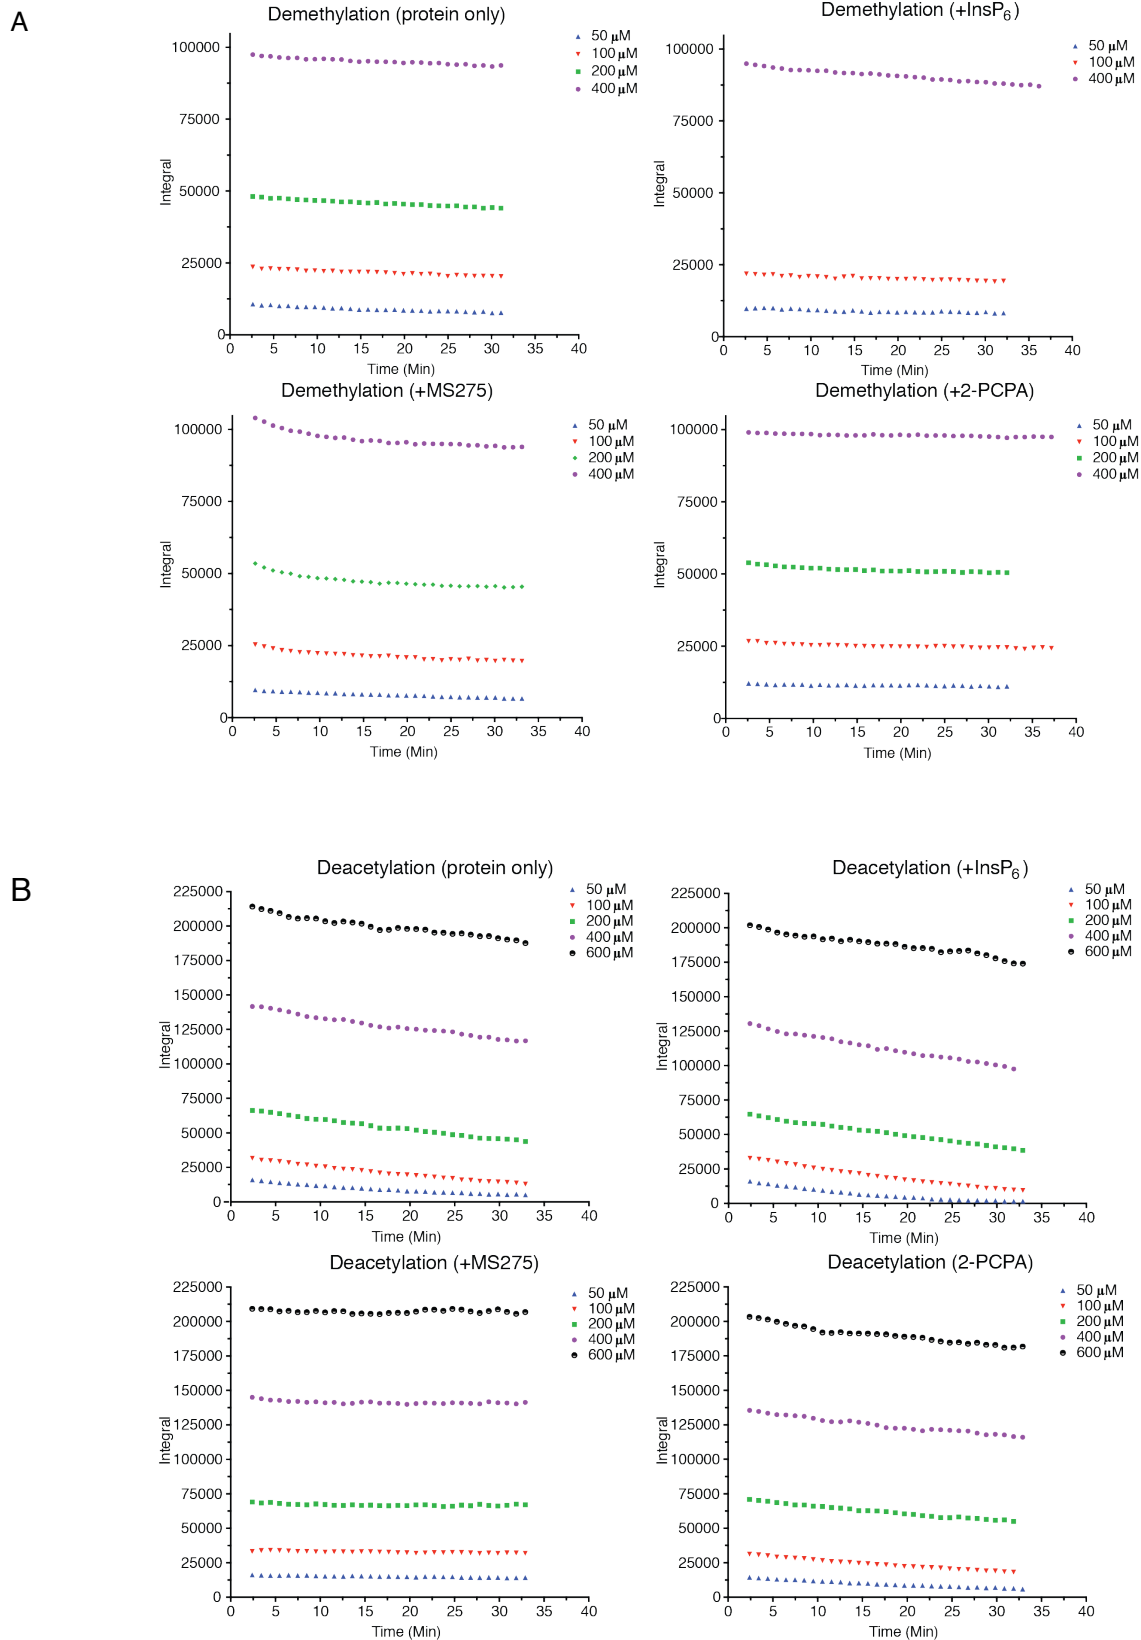

**Figure S2.** Related to Figure 2.

(A) Time-course data obtained by integrating the substrate peak of monomethylated K4 of the H3 K4meK9 substrate. 200 nM of CoREST ternary complex was used in the experiments.

(B) Time-course data obtained by integrating the substrate peak of acetylated K9 of the H3 K4K9ac substrate. 50 nM of CoREST ternary complex was used in the experiments.

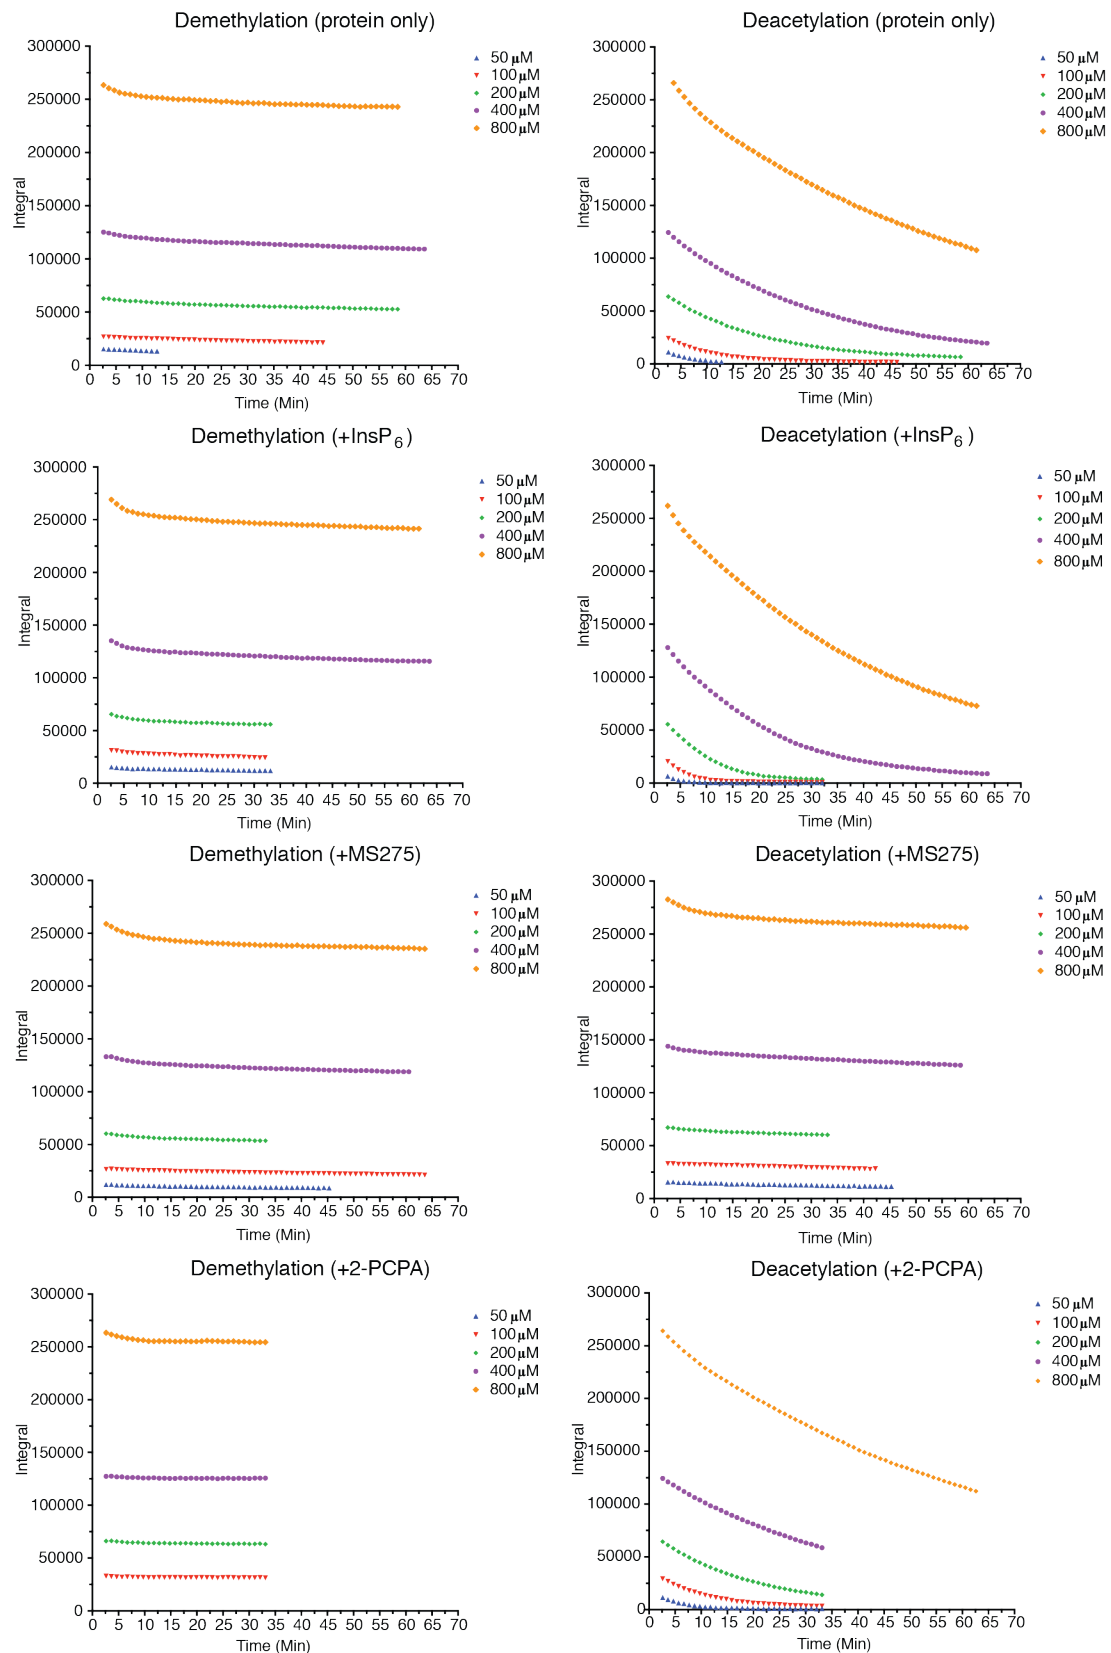

**Figure S3.** Related to Figure 2. Time-course data obtained by integrating the substrate peak of monomethylated K4 and acetylated K9 of the H3 K4meK9ac substrate. 200 nM of CoREST ternary complex was used in the experiments.

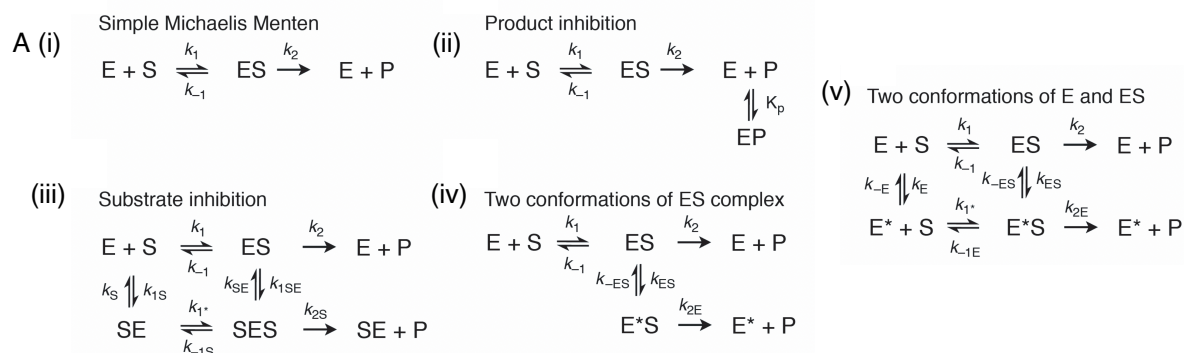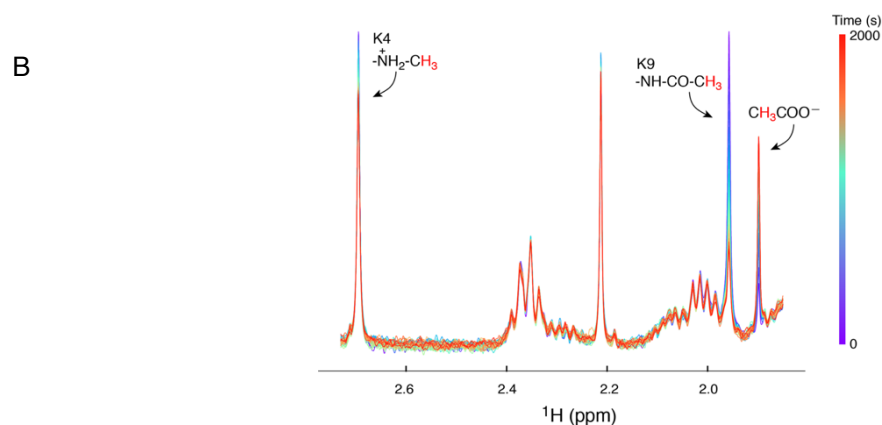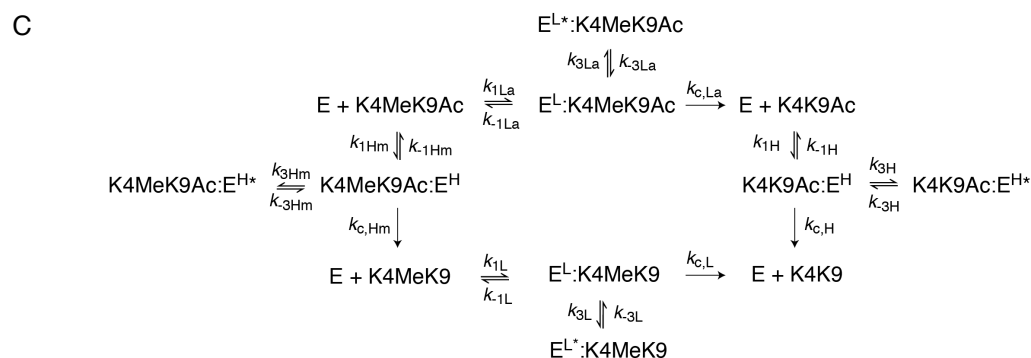

**Figure S4.** Related to Figure 2.

(A) Models considered for the demethylation of H3 K4meK9 and the deacetylation of H3 K4K9ac: A simple (i) Michaelis-Menten reaction scheme; (ii) Michaelis-Menten reaction with product-inhibition. (The equilibrium between E+P and EP is described by the equilibrium constant,  $K_p$ , and is thus assumed to be reached instantaneous); (iii) Michaelis-Menten with generalised substrate inhibition of both the free enzyme, E, and the enzyme-substrate complex, ES; (iv) Reaction scheme where the enzyme-substrate complex can exist in two conformations; (v) Reaction scheme where both the free enzyme, E, and the enzyme-substrate complex, ES, can exist in two conformations. For all reactions  $k_1 = 0.25 \times 10^6 \text{ M}^{-1}\text{s}^{-1}$  corresponding to near diffusion limit on-rate. Small changes in  $k_1$  did not change the obtained  $\chi^2$ . For the reaction schemes in (iii) and (v)  $k_{1^*} = k_1$ . Also, there are only 7 fitting parameters in scheme (iii) and (v), despite 8 shown, due to the cyclic nature of the schemes. Thus, in (v),  $k_{-1E}$ , can be calculated from  $k_{1^*}$ ,  $k_{-E}$ ,  $k_E$ ,  $k_1$ ,  $k_{-1}$ ,  $k_{-ES}$ ,  $k_{ES}$ .

(B) Series of  $^1\text{H}$  NMR spectra showing the demethylation and deacetylation of the substrate H3K4meK9ac (50  $\mu\text{M}$ ) by CoREST (200 nM).

(C) Reaction scheme used for the analysis of combined demethylation and deacetylation of the doubly modified histone H3 K4meK9ac substrate. All second-order association rates,  $k_{1Hm}$ ,  $k_{1H}$ ,  $k_{1La}$ ,  $k_{1L}$  were fixed to  $2 \cdot 10^5 \text{ M}^{-1}\text{s}^{-1}$  as discussed in the main text

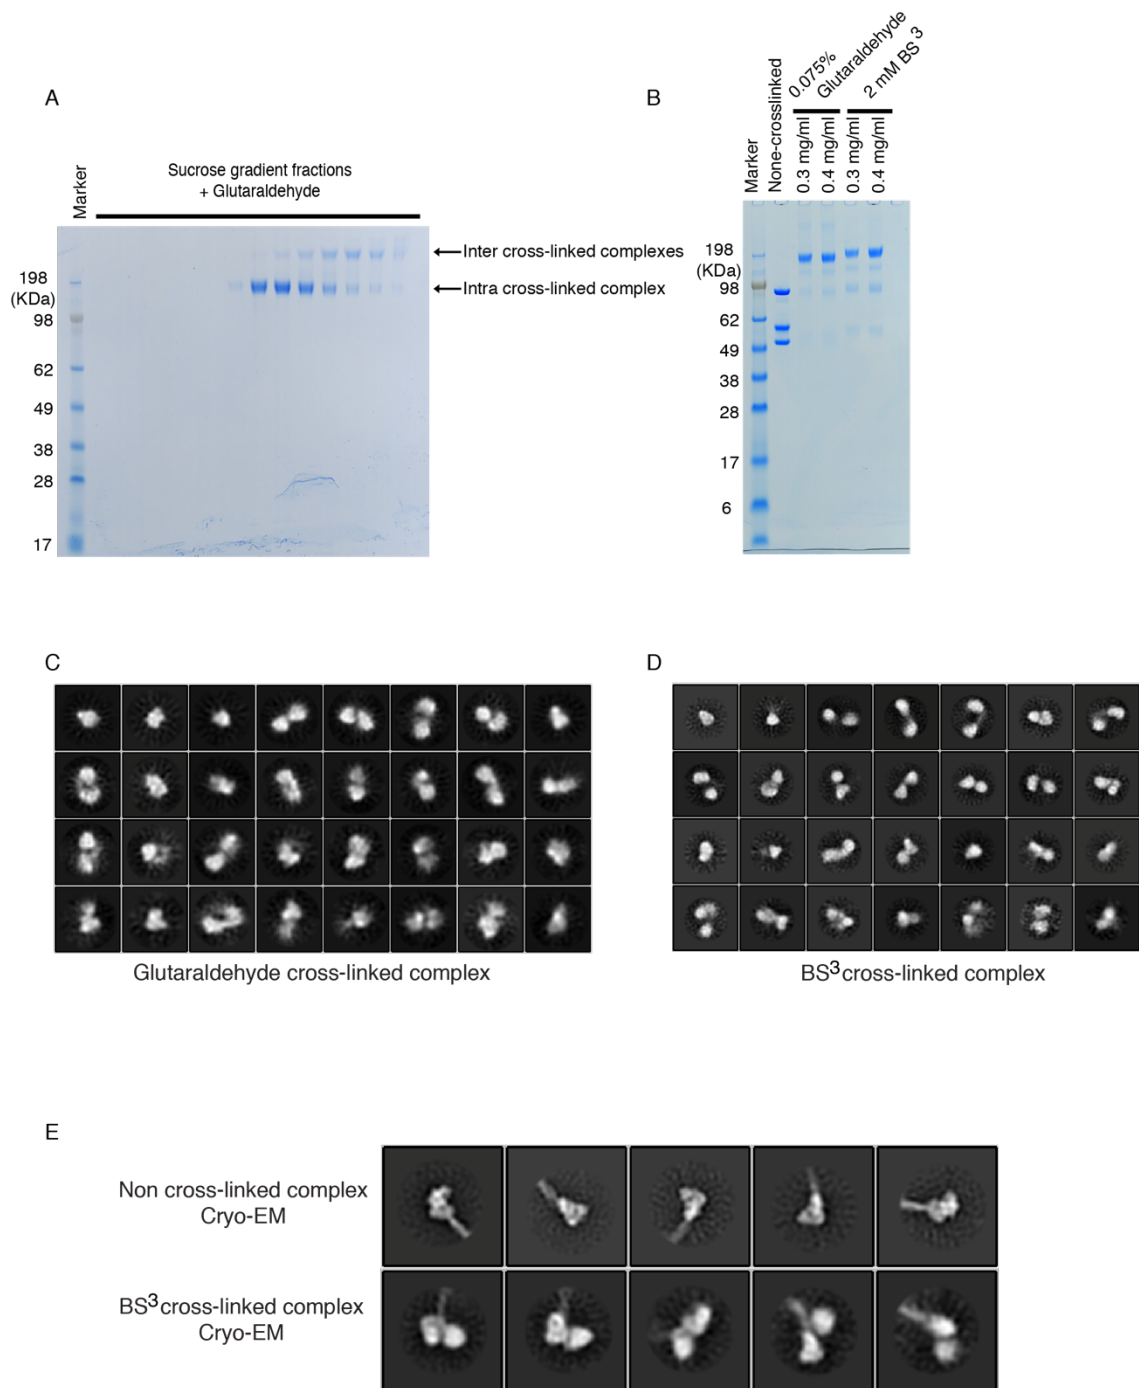

**Figure S5.** Related to Figure 4. Cryo-electron microscopy of the CoREST complex.

(A) Purification and crosslinking of the CoREST complex using a 5-25% sucrose (+0.1% glutaraldehyde) gradient. NuPAGE gel analysis of fractions 1-14 from sucrose gradient.

(B) Crosslinking the CoREST complex with 0.075% glutaraldehyde and 2 mM BS<sup>3</sup> in a microfuge tube for 5 minutes at room temperature.

(C) Selected 2D-classes of the CoREST complex cross-linked with glutaraldehyde.

(D) Selected 2D-classes of the CoREST complex cross-linked with BS<sup>3</sup>.

(E) Selected 2D-class averages of the non cross-linked CoREST complex and BS<sup>3</sup> cross-linked CoREST complex in Cryo-EM.

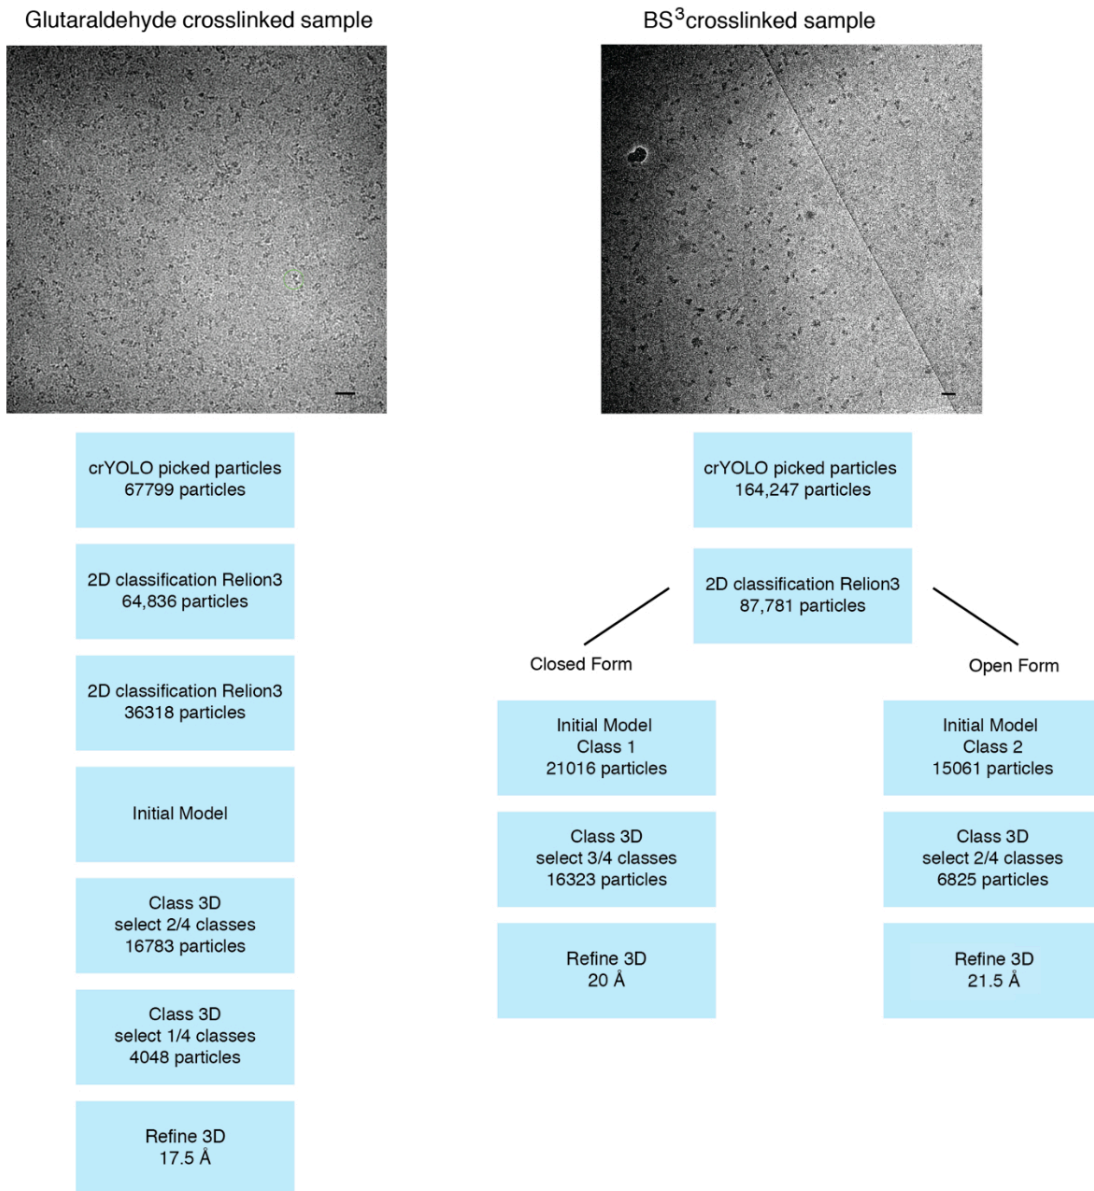

**Figure S6.** Related to Figure 4. Typical micrographs and flow chart for the Relion 3.0 processing of the cryo-EM datasets for the glutaraldehyde and BS<sup>3</sup> crosslinked CoREST samples. The scale bar in the micrographs is 20 nm.



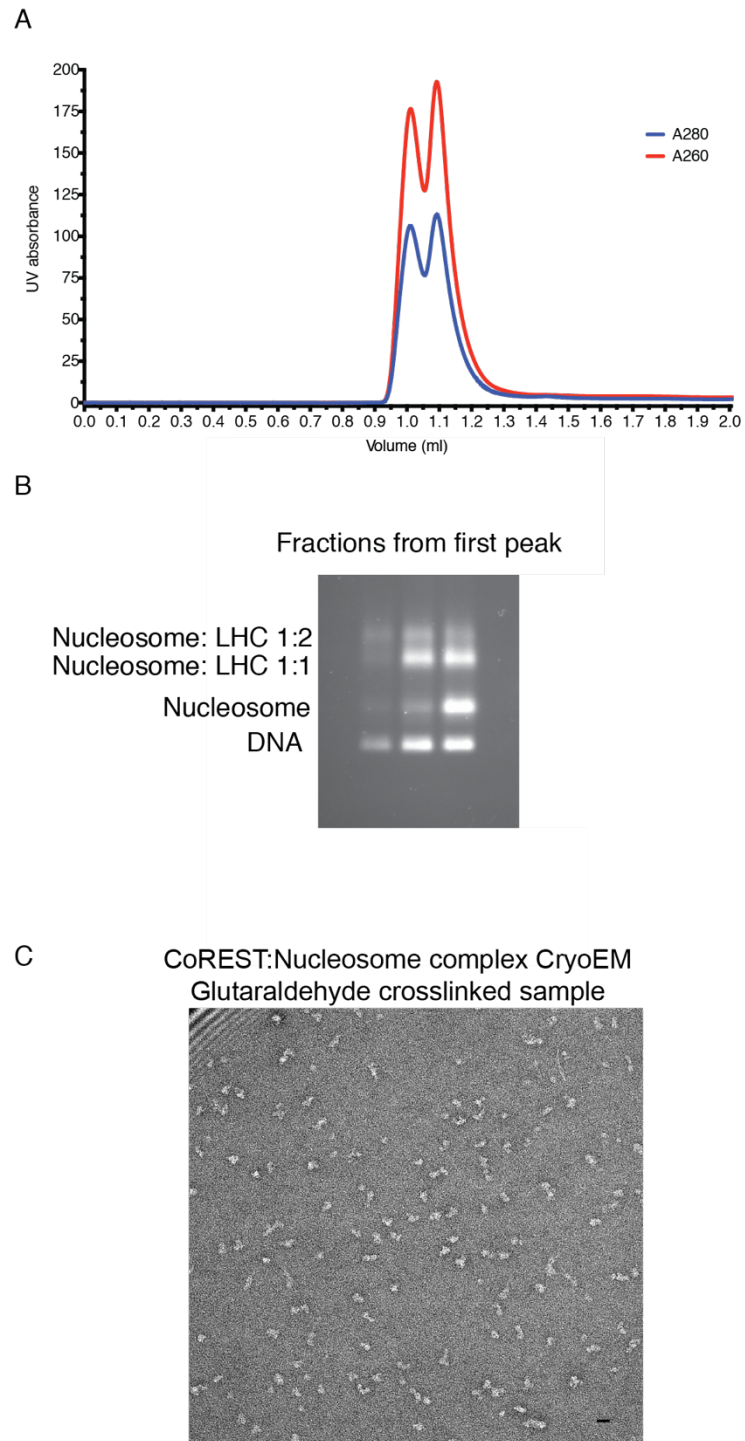

**Figure S7.** Related to Figure 5. Purification and negative stain microscopy of the nucleosome bound CoREST complex.

(A) CoREST complex was mixed with nucleosome in a molar ratio of 3:1 and then purified through a 2.4 ml Superdex 200 (3.2/300) column with a fraction size of 50  $\mu$ l.

(B) The fractions from the first peak (0.9ml - 1.05 ml) were analysed on a 0.7% agarose gel in 0.5x TB buffer. The gel was stained with ethidium bromide and visualized by UV.

(C) Typical electron micrograph of the negatively stained CoREST:nucleosome complex. The scale bar is 20 nm.



**Table S1.** Related to Figure 2. Characterisation data for purified peptides.

| Peptide                                                                           | Calculated MW [M+H] <sup>+</sup> (Da) | Run time (min)                             | ES <sup>+</sup> peaks (m/z)                                                                                                                                        | Purity (%) | Yield (%) |
|-----------------------------------------------------------------------------------|---------------------------------------|--------------------------------------------|--------------------------------------------------------------------------------------------------------------------------------------------------------------------|------------|-----------|
| <b>H-ARTK(Me)QTARKSTGG<br/>KAPRKQLA-NH<sub>2</sub><br/>(H3(1-21)K4me)</b>         | 2267.3530                             | 11.797 <sup>a</sup><br>13.223 <sup>b</sup> | 1134.5880 [M+2H] <sup>2+</sup><br>756.7203 [M+3H] <sup>3+</sup><br>567.8007 [M+4H] <sup>4+</sup><br>454.4461 [M+5H] <sup>5+</sup><br>378.6996 [M+6H] <sup>6+</sup> | >99        | 45        |
| <b>H-ARTKQTARK(Ac)STGG<br/>KAPRKQLA-NH<sub>2</sub><br/>(H3(1-21)K9Ac)</b>         | 2295.3441                             | 11.783 <sup>a</sup><br>13.193 <sup>b</sup> | 1148.6685 [M+2H] <sup>2+</sup><br>766.1127 [M+3H] <sup>3+</sup><br>574.8332 [M+4H] <sup>4+</sup><br>460.0672 [M+5H] <sup>5+</sup><br>384.1527 [M+6H] <sup>6+</sup> | >99        | 36        |
| <b>H-ARTK(Me)QTARK(Ac)ST<br/>GGKAPRKQLA-NH<sub>2</sub><br/>(H3(1-21)K4meK9ac)</b> | 2309.3636                             | 11.823 <sup>a</sup><br>13.300 <sup>b</sup> | 1155.7358 [M+2H] <sup>2+</sup><br>770.8013 [M+3H] <sup>3+</sup><br>578.3477 [M+4H] <sup>4+</sup><br>462.8733 [M+5H] <sup>5+</sup><br>385.7206 [M+6H] <sup>6+</sup> | >99        | 23        |

Analytical reverse-phase HPLC using a Dionex Ultimate 3000 system with a Phenomenex Aeris 5  $\mu$ m Peptide XB-C18 100 Å packed column with dimensions of 150 x 4.6 mm, using the following gradients: (a) 5-100% MeCN/H<sub>2</sub>O (0.1% TFA), 15 min gradient and (b) 5-100% MeCN/H<sub>2</sub>O (0.1% TFA), 30 min gradient.

**Table S2.** Related to Figure 2. Assessment of models considered for the demethylation of H3 K4meK9<sup>a)</sup>

|                     | CoREST                  | InsP <sub>6</sub> <sup>b)</sup> | MS275 <sup>c)</sup> | Total<br>normalise<br>d $\chi^2$ <sup>d)</sup> | p-value <sup>e)</sup><br>w.r.t.<br>Model (i) | p-value <sup>e)</sup><br>w.r.t.<br>Model (ii) | p-value <sup>e)</sup><br>w.r.t.<br>Model<br>(iv) |
|---------------------|-------------------------|---------------------------------|---------------------|------------------------------------------------|----------------------------------------------|-----------------------------------------------|--------------------------------------------------|
| Model <sup>a)</sup> | $\chi^2 / \chi^2_{red}$ |                                 |                     |                                                |                                              |                                               |                                                  |
| (i)                 | 61.7/0.54               | 51.0/0.60                       | 333/2.94            | 1251.4                                         |                                              |                                               |                                                  |
| (ii)                | 49.7/0.44               | 49.9/0.59                       | 190/1.69            | 812.9                                          | $2.1 \times 10^{-32}$                        |                                               |                                                  |
| (iii)               | 60.7/0.56               | 47.3/0.59                       | 332/3.07            | 1234.7                                         | 0.501                                        | N/A                                           |                                                  |
| (iv)                | 32.7/0.29               | 48.3/0.58                       | 123/1.11            | 572.8                                          | $7.1 \times 10^{-56}$                        | $1.6 \times 10^{-26}$                         |                                                  |
| (v)                 | 28.9/0.26               | 48.4/0.60                       | 37.4/0.34           | 322.0                                          | $1.2 \times 10^{-92}$                        | $1.8 \times 10^{-63}$                         | $5.0 \times 10^{-40}$                            |

a) The models considered are shown in Figure S4A. b) The CoREST complex was pre-equilibrated with 100  $\mu$ M InsP<sub>6</sub>. (c) The CoREST complex was pre-equilibrated with 5  $\mu$ M MS275 HDAC inhibitor. (d) The sum of the  $\chi^2$  calculated for CoREST only, CoREST with InsP<sub>6</sub>, and CoREST with MS275. Furthermore, the  $\chi^2$  was normalised as described by (Press et. al., 1992). (e) The probability value (significance), p-value, was calculated using F-test (Press et al., 1992). Model (v) is the most significant of the models considered.

**Table S3.** Related to Figure 2. Assessment of models considered for the deacetylation of H3 K4K9ac<sup>a)</sup>

|                     | CoREST                         | InsP <sub>6</sub> <sup>b)</sup> | 2-PCPA <sup>c)</sup> | Total normalised $\chi^2$ <sup>d)</sup> | p-value <sup>e)</sup> w.r.t. model (i) | p-value <sup>e)</sup> w.r.t. model (ii) | p-value <sup>e)</sup> w.r.t. model (iv) |
|---------------------|--------------------------------|---------------------------------|----------------------|-----------------------------------------|----------------------------------------|-----------------------------------------|-----------------------------------------|
| Model <sup>a)</sup> | $\chi^2 / \chi^2_{\text{red}}$ |                                 |                      |                                         |                                        |                                         |                                         |
| (i)                 | 1203/8.1                       | 1675/12                         | 1014/7.3             | 752.6                                   |                                        |                                         |                                         |
| (ii)                | 1167/7.9                       | 1575/11                         | 760/5.5              | 677.1                                   | 6.6×10 <sup>-12</sup>                  |                                         |                                         |
| (iii)               | 1012/7.1                       | 1666/12                         | 963/7.2              | 704.1                                   | 1.8×10 <sup>-5</sup>                   | N/A                                     |                                         |
| (iv)                | 691/4.7                        | 1391/9.9                        | 519/3.8              | 502.9                                   | 1.1×10 <sup>-39</sup>                  | 1.4×10 <sup>-30</sup>                   |                                         |
| (v)                 | 512/3.6                        | 1317/9.6                        | 462/3.5              | 443.0                                   | 9.5×10 <sup>-50</sup>                  | 1.6×10 <sup>-40</sup>                   | 6.3×10 <sup>-13</sup>                   |

a) The models considered are shown in Figure S4A. b) The CoREST complex (50 nM) was pre-equilibrated with 100  $\mu$ M InsP<sub>6</sub>. c) The CoREST complex was pre-equilibrated with 5  $\mu$ M MS275 HDAC inhibitor. d) The sum of the  $\chi^2$  calculated for CoREST only, CoREST with InsP<sub>6</sub>, and CoREST with MS275. Furthermore, the  $\chi^2$  was normalised as described by (Press et. al., 1992). e) The probability value (significance), p-value, was calculated using F-test by (Press et. al., 1992). Model (v) is the most significant of the models considered.

**Table S4.** Related to Table 1. Full list of kinetic parameters obtained for the demethylation of H3 K4meK9 substrate by CoREST.

|                                                                            | <b>Protein only</b> | <b>InsP<sub>6</sub><sup>a)</sup></b> | <b>MS275<sup>b)</sup></b> | <b>2-PCPA<sup>c)</sup></b> |
|----------------------------------------------------------------------------|---------------------|--------------------------------------|---------------------------|----------------------------|
| $\chi^2 / \chi_{\text{red}}^2$                                             | 28.8 / 0.26         | 48.2 / 0.60                          | 37.6 / 0.35               | 43.7 / 0.43                |
| <b>K<sub>m,E</sub> (μM)</b>                                                | 30 ± 21             | 2390 ± 230                           | 550 ± 300                 | 394 ± 81                   |
| <b>k<sub>cat,E</sub> (s<sup>-1</sup>)</b>                                  | 2.5 ± 1.0           | 4.61 ± 0.15                          | 3.4 ± 0.9                 | 0.97 ± 0.05                |
| <b>k<sub>cat,E</sub> / K<sub>m,E</sub> (s<sup>-1</sup>μM<sup>-1</sup>)</b> | 0.083 ± 0.047       | 0.0019 ± 0.0002                      | 0.0070 ± 0.0022           | 0.0025 ± 0.0002            |
| <b>K<sub>m,E*</sub> (μM)</b>                                               | 1.6 ± 1.4           | 146 ± 25                             | 5.4 ± 1.1                 | 23 ± 5                     |
| <b>K<sub>m,post</sub> (μM)</b>                                             | 2.9 ± 1.7           | 193 ± 30                             | 9.3 ± 1.6                 | 25.7 ± 5.5                 |
| <b>k<sub>cat,post</sub> (s<sup>-1</sup>)</b>                               | 0.032 ± 0.002       | 0.093 ± 0.007                        | 0.023 ± 0.003             | 0.0077 ± 0.0012            |
| <b>K<sub>eq</sub>(E)</b>                                                   | 7.0 ± 2.4           | 3.0 ± 0.3                            | 1.7 ± 0.6                 | 7.4 ± 0.5                  |
| <b>k<sub>ex</sub>(E) (s<sup>-1</sup>)</b>                                  | 0.0074 ± 0.0024     | 0.0015 ± 0.0013                      | 0.0028 ± 0.0015           | < 5 × 10 <sup>-4</sup>     |
| <b>K<sub>eq</sub>(ES)</b>                                                  | 76 ± 28             | 49 ± 4                               | 146 ± 38                  | 129 ± 30                   |
| <b>k<sub>ex</sub>(ES) (s<sup>-1</sup>)</b>                                 | 0.0055 ± 0.0012     | 0.047 ± 0.020                        | 0.0060 ± 0.0024           | 0.0050 ± 0.0008            |

(a) The CoREST complex was pre-equilibrated with 100 μM InsP<sub>6</sub>. (b) The CoREST complex was pre-equilibrated with 5 μM MS275 HDAC inhibitor. (c) The CoREST complex was pre-equilibrated with 100 μM 2-PCPA LSD1 inhibitor.

**Table S5.** Related to Table 2. Full list of kinetic parameters obtained for the deacetylation of H3K9ac substrate by CoREST.

|                                                  | <b>Protein only</b> | <b>InsP<sub>6</sub><sup>a</sup></b> | <b>2-PCPA<sup>b</sup></b> |
|--------------------------------------------------|---------------------|-------------------------------------|---------------------------|
| $\chi^2 / \chi_{\text{red}}^2$                   | 513 / 3.6           | 1300 / 9.6                          | 462 / 3.5                 |
| $K_{m,E}$ ( $\mu\text{M}$ )                      | 10570 $\pm$ 5700    | 10640 $\pm$ 6700                    | 1190 $\pm$ 960            |
| $k_{\text{cat},E}$ ( $\text{s}^{-1}$ )           | 440 $\pm$ 290       | 510 $\pm$ 350                       | 45 $\pm$ 33               |
| $K_{m,E^*}$ ( $\mu\text{M}$ )                    | 24 $\pm$ 5          | 5.7 $\pm$ 4.2                       | 16 $\pm$ 3                |
| $k_{\text{cat},E^*}$ ( $\text{s}^{-1}$ )         | 0.52 $\pm$ 0.03     | 0.4 $\pm$ 0.2                       | 0.33 $\pm$ 0.06           |
| $K_{m,\text{post}}$ ( $\mu\text{M}$ )            | 33 $\pm$ 6          | 12 $\pm$ 5                          | 23 $\pm$ 4                |
| $k_{\text{cat},\text{post}}$ ( $\text{s}^{-1}$ ) | 0.70 $\pm$ 0.03     | 0.78 $\pm$ 0.18                     | 0.52 $\pm$ 0.05           |
| $K_{\text{eq}}(\text{E})$                        | 6.8 $\pm$ 2.3       | 1.9 $\pm$ 2.1                       | 5.5 $\pm$ 2.2             |
| $k_{\text{ex}}(\text{E})$ ( $\text{s}^{-1}$ )    | < 10 <sup>-7</sup>  | 0.14 $\pm$ 0.17                     | 0.0031 $\pm$ 0.0017       |
| $K_{\text{eq}}(\text{ES})$                       | 2560 $\pm$ 1620     | 1990 $\pm$ 1600                     | 280 $\pm$ 220             |
| $k_{\text{ex}}(\text{ES})$ ( $\text{s}^{-1}$ )   | 0.077 $\pm$ 0.042   | 0.094 $\pm$ 0.066                   | 0.0028 $\pm$ 0.0016       |

(a) The CoREST complex was pre-equilibrated with 100  $\mu\text{M}$  InsP<sub>6</sub>. (b) The CoREST complex was pre-equilibrated with 100  $\mu\text{M}$  2-PCPA LSD1 inhibitor.

**Table S6.** Related to Figure 2. Combined analyses of K4meK9, K4K9ac and K4meK9ac using time points up to 2000 s.

| Model no.       | Comments                                                                                                                                                                                                                                                                                                                                  | $\chi^2 / \chi_{red}^2$ |
|-----------------|-------------------------------------------------------------------------------------------------------------------------------------------------------------------------------------------------------------------------------------------------------------------------------------------------------------------------------------------|-------------------------|
| 1 <sup>a</sup>  | <i>Completely uncoupled reactions:</i> It is assumed that the HDAC and LSD1 are completely uncoupled, that both demethylation and deacetylation reactions follow Michaelis-Menten and that (a) demethylation of K4meK9ac follows the same parameters as K4meK9 (b) deacetylation of K4meK9ac follows the same parameters as K4K9ac.       | 10706 / 20.5            |
| 2               | <i>Semi-uncoupled reactions:</i> It is assumed that the HDAC and LSD1 functions independently, but that there is a substrate dependence. Thus, different Michaelis-Menten parameters are assumed for demethylation of K4meK9ac and K4meK9 and different Michaelis-Menten parameters are assumed for deacetylation of K4meK9ac and K4K9ac. | 7147 / 13.8             |
| 3               | <i>Semi-coupled reactions:</i> It is assumed that CoREST can only bind one substrate at once. Thus, if substrate is bound to LSD1 then substrate cannot bind to HDAC. Michaelis-Menten parameters are independent on substrate.                                                                                                           | 12991 / 24.9            |
| 4 <sup>a</sup>  | <i>Coupled reactions:</i> It is assumed that CoREST can only bind one substrate at once. Substrate dependent Michaelis-Menten parameters are assumed.                                                                                                                                                                                     | 2570 / 4.96             |
| 5               | <i>Semi-uncoupled reactions with product inhibition.</i> Same as model 2 but with product inhibition, assuming different dissociation constants, $K_i$ , for (a) LSD1 inhibition by K4K9ac (b) LSD1 inhibition by K4K9 (c) HDAC inhibition by K4meK9 and (d) HDAC inhibition by K4K9.                                                     | 3111 / 6.05             |
| 6               | <i>Semi-coupled reactions with product inhibition.</i> Same as Model 3 but with product inhibition as in Model 5.                                                                                                                                                                                                                         | 3731 / 7.19             |
| 7               | <i>Coupled reactions with product inhibition.</i> Same as Model 4, but with product inhibition.                                                                                                                                                                                                                                           | 2529 / 4.91             |
| 8 <sup>a</sup>  | <i>Coupled reaction with alternate state of enzyme-substrate complexes (Figure S6).</i> Assuming $k_{\pm 3L} = k_{\pm 3La} = k_{\pm 3H} = k_{\pm 3Hm}$                                                                                                                                                                                    | 1981 / 3.84             |
| 9 <sup>a</sup>  | <i>Coupled reaction with alternate state of enzyme-substrate complexes (Figure S6).</i> Assuming all $k_{\pm 3L} = k_{\pm 3La}$ , $k_{\pm 3H} = k_{\pm 3Hm}$                                                                                                                                                                              | 1614 / 3.14             |
| 10 <sup>a</sup> | <i>Coupled reaction with alternate state of enzyme-substrate complexes (Figure S6).</i>                                                                                                                                                                                                                                                   | 1589 / 3.10             |
| 11 <sup>a</sup> | <i>Coupled reaction with alternate state of the enzyme-substrate complexes and product inhibition.</i>                                                                                                                                                                                                                                    | 1587 / 3.12             |
| 12              | <i>Coupled reaction with alternate state of the free enzyme and enzyme-substrate complexes</i>                                                                                                                                                                                                                                            | Not converged.          |

(a) The following  $p$ -levels are obtained from comparisons of the chi-squared,  $\chi^2$ , and the degrees of freedoms of the fits. Model 1 v.s. Model 4:  $p$ -level  $< 10^{-50}$ , Model 2 v.s. Model 4: Model 4 v.s. Model 8:  $p$ -level =  $7 \times 10^{-30}$ , Model 9 v.s. Model 8:  $p$ -level =  $1 \times 10^{-23}$ , Model 10 v.s. Model 9:  $p$ -level = 0.018, Model 11 v.s. Model 10:  $p$ -level = 0.89. The most significant model is Model 10, that is, a coupled reaction with different rate constants for the different substrates and an exchange of the enzymes with alternate states.

**Table S7.** Related to Figure 3. Data collection and structure statistics for small angle X-ray scattering analysis

| <b>Sample properties</b>                                            |                                                            |
|---------------------------------------------------------------------|------------------------------------------------------------|
| Organism                                                            | Homo sapiens                                               |
| Solvent                                                             | 25 mM Tris pH 7.5, 50 mM potassium acetate and 0.5 mM TCEP |
| Components                                                          | RCOR1 (86-485)<br>HDAC1<br>LSD1                            |
| <b>Data collection parameters</b>                                   |                                                            |
| Instrument                                                          | Diamond light source B21 (Didcot, UK)                      |
| Beam geometry (mm <sup>2</sup> )                                    | 0.8 × 2 mm                                                 |
| Wavelength (Å)                                                      | ~ 1                                                        |
| s range (Å <sup>-1</sup> )                                          | 0.0032 - 0.38                                              |
| Exposure time (s)                                                   | 5                                                          |
| Temperature (K)                                                     | 298                                                        |
| <b>Structural parameters</b>                                        |                                                            |
| R <sub>g</sub> (Å) (from P(r))                                      | 58.14                                                      |
| R <sub>g</sub> (Å) (from Guinier plot)                              | 60                                                         |
| I(0) (from P(r))                                                    | 0.00682                                                    |
| I(0) (from Guinier plot)                                            | 0.00825                                                    |
| D <sub>max</sub> (Å)                                                | 158                                                        |
| Porod volume estimate (Å <sup>3</sup> )                             | 437000                                                     |
| <b>Molecular mass determination (kDa)</b>                           |                                                            |
| From Porod volume                                                   | 257                                                        |
| From SAXS MoW                                                       | 265                                                        |
| Calculated molecular mass from sequence                             | 194                                                        |
| <b>Software employed</b>                                            |                                                            |
| Primary data reduction                                              | ScÅtter                                                    |
| Data processing                                                     | ScÅtter                                                    |
| Ab initio analysis                                                  | ScÅtter/DAMIF                                              |
| Validation and averaging                                            | ScÅtter/DAMAVER                                            |
| Atomic structure modelling                                          | CORAL                                                      |
| Computation of model intensities and fitting with experimental data | CRYSOL                                                     |
| 3D graphics representations                                         | Pymol                                                      |
